# Supplementary material for: Target-controlled liposome amplification for versatile nanopore analysis
Source: Royal Society of Chemistry journal article supplement (doi:10.1039/c9cc00285e), 2019-01-01
Supplement: c9cc00285e1.pdf [file c9cc00285e1.pdf]

*Supporting information*

**Target-Controlled Liposome Amplification for Versatile  
Nanopore Analysis**

Lei Tian,<sup>a</sup> Ying Wang,<sup>a</sup> and Xiaofeng Kang<sup>a\*</sup>

<sup>a</sup>Key Laboratory of Synthetic and Natural Functional Molecular Chemistry,  
College of Chemistry & Materials Science, Northwest University, Xi'an  
710069, P. R. China

E-mail: [kangxf@nwu.edu.cn](mailto:kangxf@nwu.edu.cn)

## Experimental Section

### Chemicals and Materials

1,2-Diphytanoyl-*sn*-glycero-3-phosphocholine(DPhPc), 1,2-dipalmitoyl-*sn*-glycero-3-phosphoethanolamine-N-(biotinyl) (Biotin-DPPE) were purchased from Avanti Polar Lipids (USA). Avidin ( $\geq 98.0\%$ ), Avidin-FITC and inositol hexaphosphate (IP<sub>6</sub>) ( $\geq 98.0\%$ ) were obtained from Sigma-Aldrich. The thickness of Teflon film (Goodfellow) was 25  $\mu\text{m}$ . Biotinylated short polypeptide hormone thyrotropin-releasing factor (TRF) was purchased from SciLight Biotechnology, Beijing, China.

### Preparation of Small Unilamellar Phospholipid Vesicles.

The SUVs were prepared by classical film dispersion method.<sup>1,2</sup> Briefly, 5 mL chloroform solution of DPhPc/cholesterol (40mg/10mg) or DPhPc/Biotin-PE/cholesterol (40mg/4mg/10mg) mixture were added into a clean glass round bottom flask. Then the chloroform was removed by rotary evaporation under reduced pressure at room temperature leaving a thin film of lipid on the bottom of flask. The dried lipid film were then hydrated with 2mL 10mM Tris buffer (pH 7.4) for 2h at 65°C, followed by continuing rotated 2h under room temperature. Sonication under ice bath was conducted on a probe sonicator with a 10s on 30s off procedure for 1h. Final lipid concentration of the as-prepared vesicles is  $\sim 20$  mg/mL. All suspensions were used immediately after the preparation.

The capsulation of IP<sub>6</sub> is achieved through simply substitute 2mL 10mM Tris buffer (pH 7.4) in hydration for 0.1M IP<sub>6</sub> in same buffer solution. Five cycles of freeze-thawing of prepared SUVs were performed in liquid nitrogen or room temperature to enhance the capsulation ratio of IP<sub>6</sub>. Free IP<sub>6</sub> was removed through dialysis against 10mM Tris buffer (pH 7.4).

### WT- $\alpha$ HL Monomers and Homoheptamer Pores.

The  $\alpha$ -HL M113R RL2 monomers were expressed in Escherichia coli BL-21 (DE3) pLysS and purified by SDS-polyacrylamide gel electrophoresis. The assembly and purification of heptametrical protein pores were carried out as reported previously.<sup>3</sup>

### Single-Channel Current Recording.

A bilayer of 2-diphytanoylphosphatidylcholine was formed over a 130~150  $\mu\text{m}$  aperture in a Teflon septum that divided a planar bilayer chamber into cis and trans compartments. The formation of the bilayer was achieved using the Montal–Mueller method.<sup>4</sup> Each solution contained 1 M KCl and was buffered with 10 mM Tris (pH 7.4).  $\alpha\text{-HL(M113R)}_7$  was added to the cis compartment which was connected to ground. The trans compartment was connected to the head-stage of the amplifier. Then, liposome was mixed and vortexed with certain amount of  $\alpha\text{-HL(M113R)}_7$  for 15 minutes. Multiple  $\alpha\text{HL}$  nanochannels would be formed on the lipid bilayer of liposome and induced  $\text{IP}_6$  release. Then the mixture solution was added into the cis or trans compartment according to the scheme. The final concentration of the  $\alpha\text{-HL}$  proteins used for the single-channel insertion was 0.05–0.3 ng/mL.

In competitive immunoassay of biotinylated TRF, biotin-TRF was firstly mixed with certain amount of avidin, and kept vortex for 5minutes. Biotin-SUVs aqueous solution was then added in the mixture dropwise and kept vortex for 15minutes before addition in the cis chamber for further single channel current recording. The final concentration of avidin and biotin-SUVS is 1.5 pM and 0.25  $\mu\text{g/mL}$ .

Currents were recorded with a patch clamp amplifier (Axopatch 200B, Molecular Devices, Sunnyvale, CA) at  $\pm 30$  mV, filtered with a built-in four-pole Bessel filter at 5 kHz, sampled at 100 kHz by a computer equipped with a Digidata 1440 A/D converter (Molecular Devices), and acquired with Clampex 10.3 software (Molecular Devices). Single-channel event amplitude and duration were processed and analyzed by Clampfit 10.5 (Molecular Devices) and origin 8.0 software (Microcal, Northampton, MA).  $\tau_{\text{on}}$  represents the statistical value of time between neighbor translocation events which is the inverse of the frequency of events. The mean values of  $\Delta I$  ( $\Delta I$  is the current different between the current of partially blocked by  $\text{IP}_6$  and that of the unoccupied current ) were obtained from  $\Delta I$  histograms by fitting the distributions to Gaussian functions.

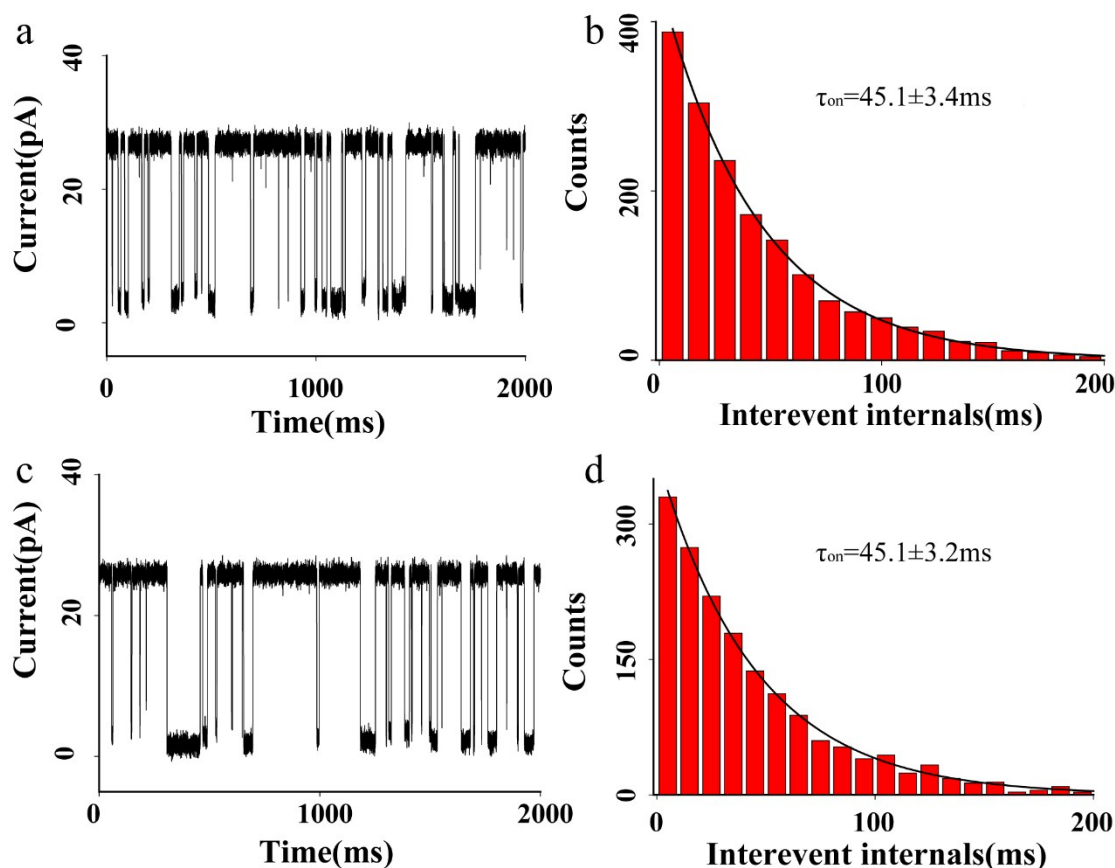

**Fig. S1** Biotin modification has less effect on IP<sub>6</sub> release from SUVs. Representative single-channel current traces and histogram of interevent interval ( $\tau_{on}$ ) of IP<sub>6</sub> released from SUVs (DPhPc 40mg / cholesterol 10mg, a and b) and biotin-SUVs (DPhPc 40mg / Biotin-DPPE 4mg / cholesterol 10mg, c and d) passing through a single  $\alpha$ -HL pore. The inserted black line in (b) and (d) were exponential decay fitting. The experiments were performed in solution containing 1M KCl buffered with 10 mM Tris-HCl (pH=7.4). The transmembrane potential is +30 mV relative to the cis side of the bilayer. The final concentration of liposome and biotin-liposome is  $\sim 0.25 \mu\text{g/mL}$  for all these experiments. The concentration of  $\alpha$ -HL in cis chamber is 0.5 ng/mL.

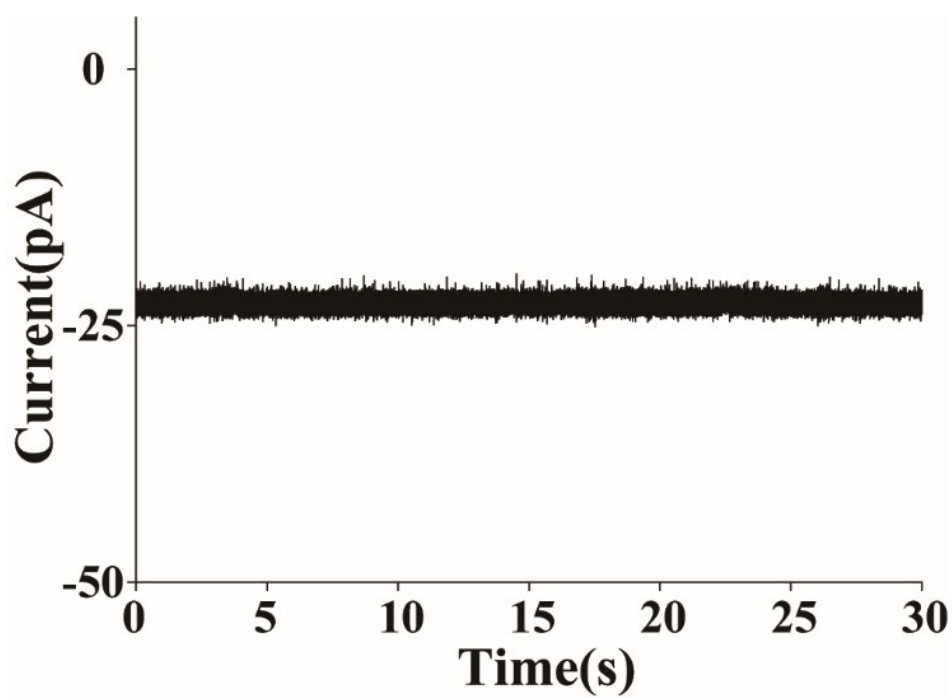

**Fig. S2** Representative current trace recorded when IP<sub>6</sub> capsulated SUVs were added in the trans-side of the chamber, and bias potential was -30 mV. No transfer event was detected. The trace was recorded with 1.25 ug/mL SUVs, 1M KCl, and 10mM Tris (pH=7.4).

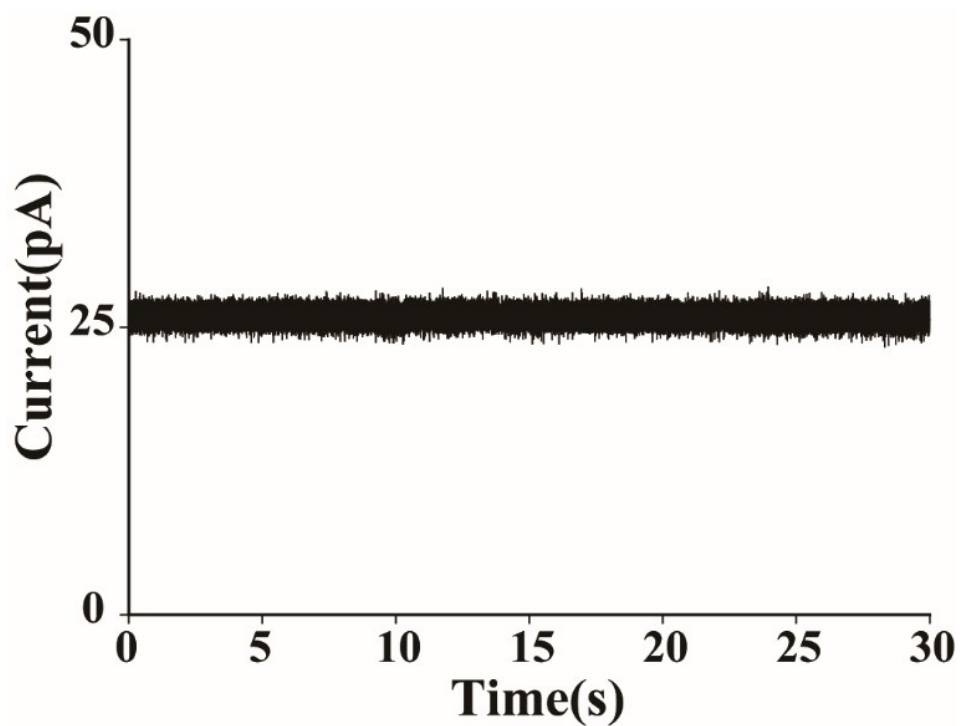

**Fig. S3** Representative current trace recorded when 60  $\mu\text{L}$  aqueous solution out of dialysis bag after the last dialysis was added in cis side chamber. The bias potential was +30 mV. No transfer event was detected. The trace was recorded with 1M KCl, and 10mM Tris (pH=7.4).

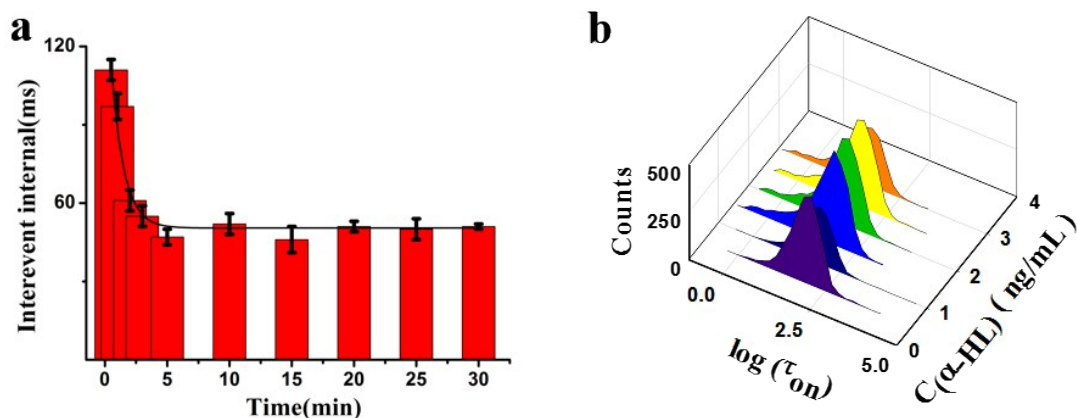

**Fig. S4** The release dynamic of IP<sub>6</sub> from biotin-SUVs was represented by plot of  $\tau_{on}$  change versus time in (a). The effect of concentration of  $\alpha$ -HL on  $\tau_{on}$  is represented in (b). The experiments were performed in solution containing 1M KCl buffered with 10 mM Tris-HCl (pH=7.4). The transmembrane potential is +30 mV relative to the cis side of the bilayer. The final concentration of liposome and biotin-liposome is  $\sim 0.25 \mu\text{g/mL}$  for all these experiments.

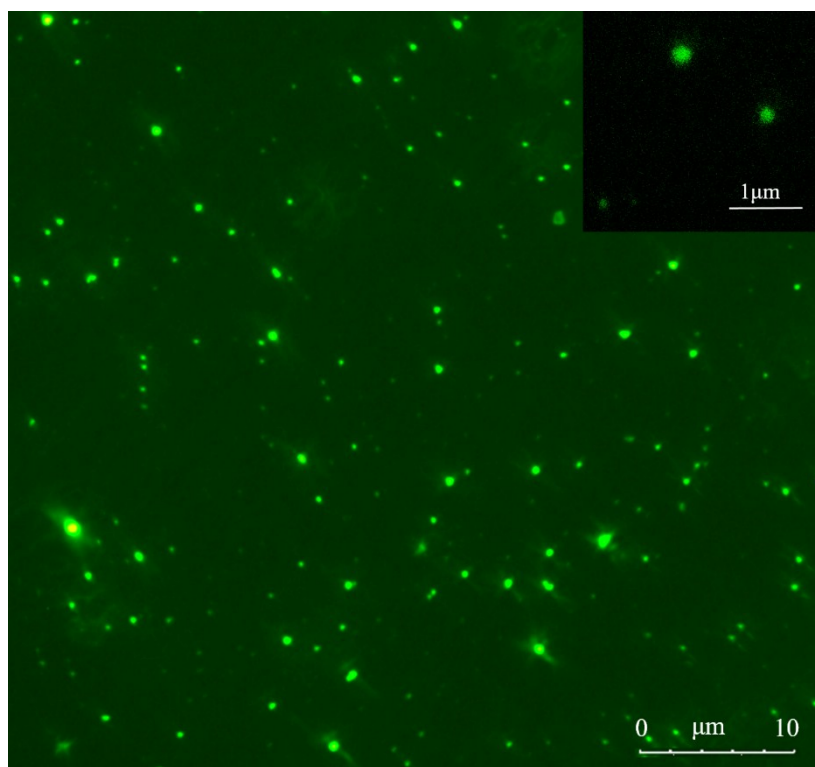

**Fig. S5** Representative of fluorescent microscopy images of FITC-avidin tagged biotin-SUVs. Inset is confocal fluorescent image for clarity. Scale bars were labeled on the images.

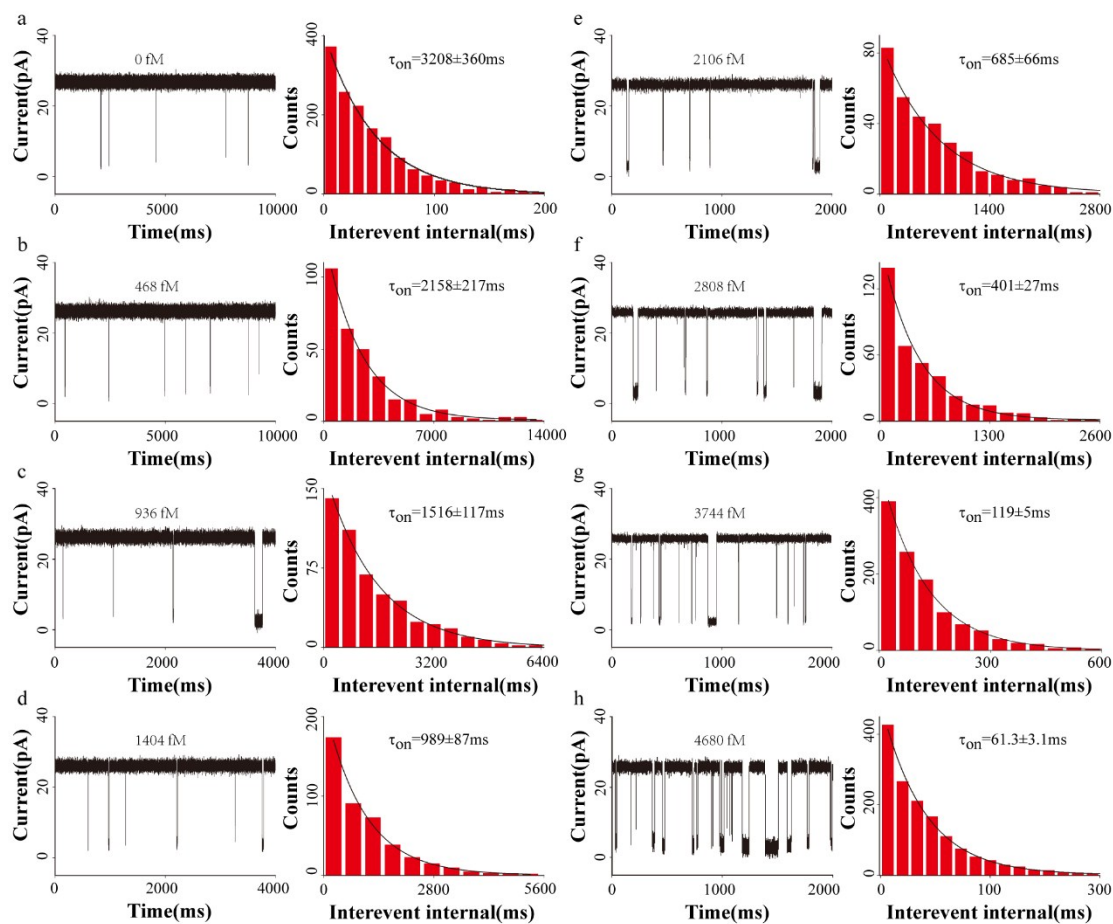

**Fig. S6** Representative single-channel current traces (left) and histogram of interevent interval ( $\tau_{on}$ , right) of IP<sub>6</sub> through a  $\alpha$ -HL(M113R)<sub>7</sub> nanopore recorded with different biotin-TRF concentration. The experiments were performed at +30 mV in 10 mM Tris solutions containing 1 M KCl (pH 7.4). The concentration of biotin-TRF increased from (a) 0 fM, (b) 468 fM, (c) 936 fM, (d) 1404 fM, (e) 2106 fM, (f) 2808 fM, (g) 3744 fM, (h) 4680 fM.

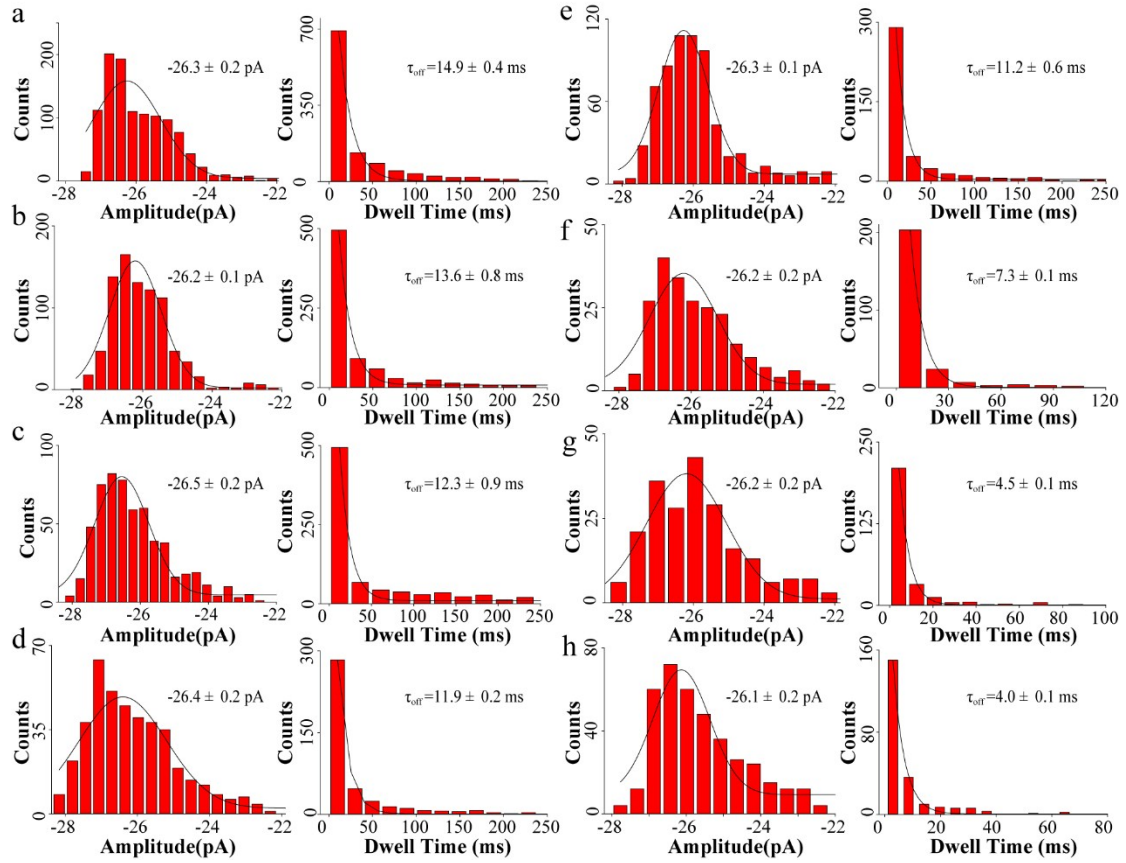

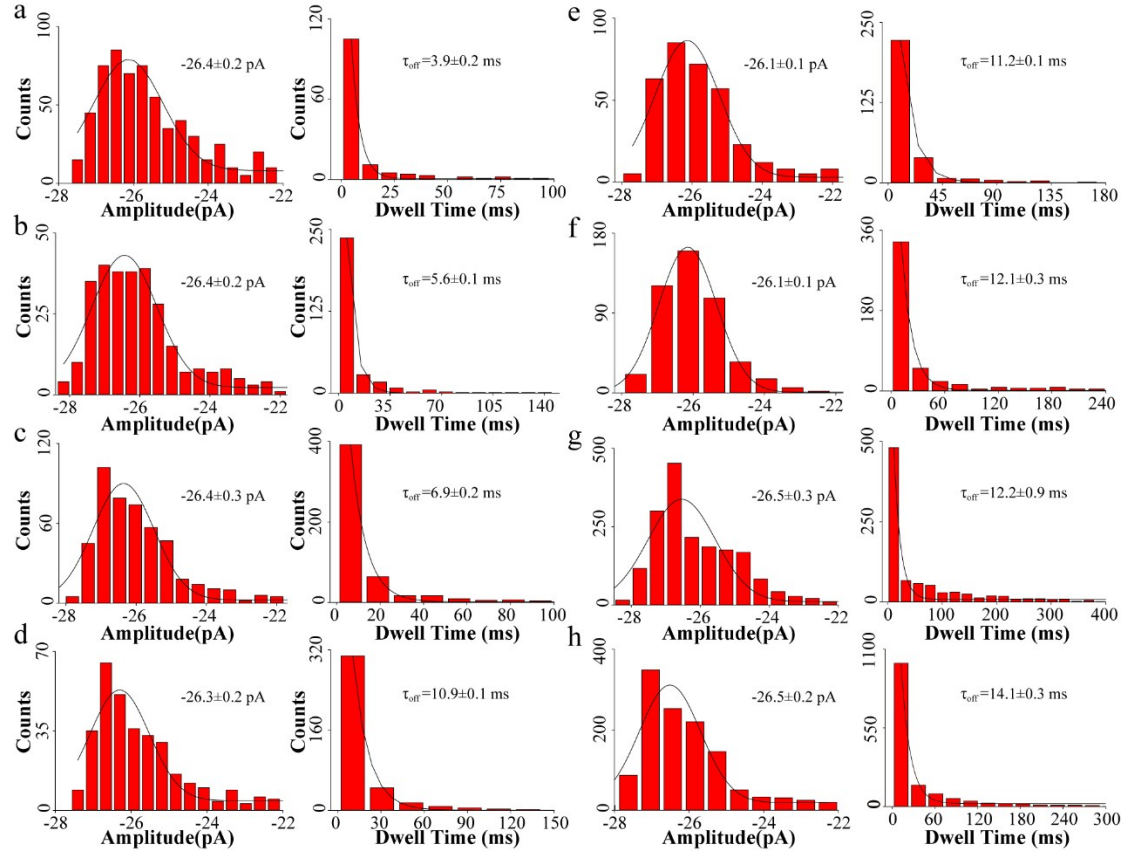

**Fig. S8** Representative histogram of current (left) and dwell time ( $\tau_{\text{off}}$ , right) of  $\text{IP}_6$  through a  $\alpha\text{-HL(M113R)}_7$  nanopore recorded with different biotin-TRF concentration. The experiments were performed at +30 mV in 10 mM Tris solutions containing 1 M KCl (pH 7.4). The concentration of biotin-TRF increased from (a) 0 fM, (b) 468 fM, (c) 936 fM, (d) 1404 fM, (e) 2106 fM, (f) 2808 fM, (g) 3744 fM, (h) 4680 fM.

## References

- 1 A. D. Bangham, M. M. Standish and J. C. Watkins, *J. Mol. Biol.*, 1965, **13**, 238-252.
- 2 Q. Xue, W. Jiang and L. Wang, *Chem. Commun.*, 2016, **52**, 10660–10663.
- 3 S. Cheley, O. Braha, X. Lu, S. Conlan and H. Bayley, *Protein Sci.*, 1999, **8**, 1257–1267.
- 4 M. Montal and P. Mueller, *Proc. Natl. Acad. Sci.*, 1972, **69**, 3561–3566.
